# Rapid Determination of Antibiotic Susceptibility by Stimulated Raman Scattering Imaging of D<sub>2</sub>O Metabolism

Weili Hong,<sup>†</sup> Ji-Xin Cheng<sup>\*,†,‡,§</sup>

<sup>†</sup> Beijing Advanced Innovation Center for Biomedical Engineering, School of Biological Science and Medical Engineering, Beihang University, Beijing 100083, China

<sup>‡</sup> Department of Electrical & Computer Engineering, <sup>§</sup> Department of Biomedical Engineering, Boston University, Boston, Massachusetts 02215, United States

---

**Abstract:** Rapid antibiotic susceptibility testing (AST) is urgently needed for treating infections with correct antibiotics and slowing down the emergence of antibiotic resistant bacteria. Current clinical methods rely on culture and take at least 16 h. Here, using *P. aeruginosa*, *E. coli* and *S. aureus* as models, we show that the AST can be finished in 10 minutes by stimulated Raman scattering (SRS) imaging of D<sub>2</sub>O metabolic activities. The metabolic incorporation of D<sub>2</sub>O, which is used for biomolecule synthesis, can be monitored in a single bacterium. Time lapse experiments show that the C-D vibrational signal can be observed in a single bacterium within 10 minutes culture in D<sub>2</sub>O medium. Since water is universally used for biosynthesis in bacteria, SRS imaging of D<sub>2</sub>O metabolism has the potential to be generalizable to different bacteria species.

---

Antimicrobial resistance has become a growing public threat, causing nearly 1 million deaths from drug-resistant infections each year globally<sup>1</sup>. It was estimated that by 2050, antimicrobial resistance will cause 10 million deaths and \$100 trillion GDP loss if no action is taken<sup>1,2</sup>. To combat this crisis, new rapid diagnostic methods for antibiotic susceptibility testing (AST) are essential to reduce the deaths caused by drug-resistant infections<sup>3</sup>, and slow down the emergence of antimicrobial resistance. The culture-based phenotypic method remains the gold standard for AST. However, this method is too slow for guidance of immediate decision for infectious disease treatment. Genotypic methods, which detect known resistance genes, can provide faster results, but are not generally applicable to different bacteria and mechanism of resistance<sup>4</sup>.

To overcome these limitations, other methods have been developed for rapid AST, including, for example, microfluidic devices that increase the detection sensitivity by confining the sample in a small area<sup>5-10</sup>, imaging-based methods that monitor the growth or morphology change at the single cell level<sup>10-12</sup>, nucleic acids-based phenotypic AST quantifying nucleic acids copy number with antibiotic treatment<sup>4,13,14</sup>, and monitoring the spectral response to antibiotic treatment by Raman spectroscopy<sup>15</sup>. While these methods significantly reduce the time for AST, they either are not generalizable to different bacteria, or rely on cell proliferation, which has difficulties for viable but nonculturable species<sup>16</sup>, or require gene marker information before testing<sup>17</sup>.

We have previously demonstrated that the AST of bacteria can be accomplished within one cell cycle (30 minutes) by measuring the metabolic activity in single bacteria under a stimulated Raman scattering (SRS) microscope<sup>18</sup>. Specifically, we monitored the metabolic activity of deuterated glucose, glucose-d<sub>7</sub>, with chirped picosecond SRS at C-D vibrational frequency and used the C-D signal as a marker to perform AST. Like glucose, water is also ubiquitously used for biomolecule

synthesis in bacteria<sup>19</sup>, and its metabolism can be selectively probed via monitoring the conversion of heavy water (D<sub>2</sub>O) into deuterated biomolecules at C-D vibrational frequency. Unlike glucose-d<sub>7</sub>, D<sub>2</sub>O itself does not have C-D bonds, therefore providing a better contrast for SRS metabolic imaging. The metabolic activity of D<sub>2</sub>O has been used to study the metabolic-active bacteria with spontaneous Raman spectroscopy<sup>16,19</sup>. However, the speed of spontaneous Raman is limited by the weak Raman scattering process<sup>20</sup>. Compared to spontaneous Raman, SRS has orders-of-magnitude signal enhancement, thereby enabling high speed chemical imaging of single cells<sup>21-26</sup>. SRS imaging of D<sub>2</sub>O metabolism was recently demonstrated to be a noninvasive method to visualize metabolic dynamics in mammalian cells and live animals<sup>27</sup>.

Here, we demonstrate that femtosecond SRS imaging of D<sub>2</sub>O metabolism can determine the susceptibility of bacteria within 10 minutes. We show that the metabolic activity of D<sub>2</sub>O can be monitored in single *P. aeruginosa*, *E. coli* and *S. aureus*. For the broad C-D vibrational spectrum, the SRS signal of bacteria can be improved by more than 5 times by femtosecond SRS compared to the chirped SRS. The D<sub>2</sub>O metabolism in bacteria responds differently as fast as 10 minutes to different antibiotics, depending on the susceptibility of bacteria. Our work shows the promise of using SRS microscopy for metabolic activity studies and rapid AST at single bacterium level.

## Experimental Section

**SRS microscope.** A femtosecond (fs) pulsed laser (InSight DeepSee, Spectra-Physics) with an 80-MHz repetition rate and dual outputs was employed for the SRS microscope. One 120 fs laser with tunable 680–1100 nm wavelength was served as the pump beam. The other 220 fs laser centered at 1040 nm, served as the Stokes beam, was modulated by an acousto-optical modulator (AOM, 1205-C, Isomet) at ~2.4 MHz. The

two beams were collinearly combined through a dichroic mirror. When spectral focusing is needed for hyperspectral SRS, both beams were chirped with two 15 cm long SF57 glass rods. After chirping, the pulse durations of the pump and Stokes laser were 1.9 ps and 1.3 ps, respectively. For implementation of SRS imaging with femtosecond pulses, the glass rods were removed from the path. The pump and Stokes beams were directed into a lab-built laser scanning microscope. A 60x water objective (NA=1.2, UPlanApo/IR, Olympus) was used to focus the lasers to the sample, and an oil condenser (NA=1.4, U-AAC, Olympus) was used to collect the signal from the sample. Two filters (HQ825/150m, Chroma) were used to filter out the Stokes beam, the pump beam was detected by a photodiode (S3994-01, Hamamatsu) and the stimulated Raman signal was extracted by a lock-in amplifier (HF2LI, Zurich Instrument).

**Sample preparation.** To make D<sub>2</sub>O containing LB medium, D<sub>2</sub>O was first mixed with purified water, then LB broth powder (Sigma Aldrich) was added to the solution with a final concentration of 2% in weight. The solution was sterilized by filtering. To prepare bacteria samples, *E. coli*, *S. aureus* or *P. aeruginosa* were cultivated in normal LB medium for 2–3 h to reach to log phase, then bacteria were diluted in a 1:100 ratio to the D<sub>2</sub>O containing LB medium. After incubation for a controlled period, 500  $\mu$ l sample was centrifuged, washed twice with purified water, and deposited to an agarose gel pad.

To prepare the agarose gel pad, ~1% in weight agarose powder was added to 5 ml purified water in a plastic tube, then the tube was heated in microwave for about 20 seconds to melt the agarose powder. About 10  $\mu$ l heated agarose gel solution was added to a coverglass by a pipette, another coverglass was immediately put on the top of the agarose gel solution to make it flat. After ~2 min, one coverglass was removed from the agarose gel by sliding the two coverglasses. Bacteria in solution were deposited to the gel pad, then another coverglass was put on top of the gel pad for SRS imaging.

**SRS imaging.** To image bacteria at the C-D region, the pump wavelength was tuned to 849 nm, and the power at the sample was ~12 mW; the Stokes wavelength was fixed at 1040 nm, and the power at the sample was ~90 mW. Each image contains 200  $\times$  200 pixels, the pixel dwell time is 30  $\mu$ s.

**Spontaneous Raman spectroscopy.** Bacteria in solution were deposited on a coverglass for spontaneous Raman measurement. Spontaneous Raman spectra of bacteria were acquired with an inverted Raman spectrometer (LabRAM HR evolution, Horiba scientific) with 532 nm laser source. The laser power at the sample was ~12 mW after 40x air objective, the acquisition time was 10 s. The grating was 600 l/mm.

**Broth dilution method.** Bacteria were cultured in D<sub>2</sub>O containing LB medium in a 96-well plate. Antibiotics, using triplicate samples, were added to the plate and serially diluted. After about 20 h incubation at 37 °C, plates were visually inspected, and the MIC was categorized as the concentration at which no visible growth of bacteria was observed.

## Results and Discussion

**D<sub>2</sub>O induces negligible toxicity to bacteria.** We first tested whether D<sub>2</sub>O has toxicity to bacteria by measuring their growth in D<sub>2</sub>O containing medium. Three types of bacteria (*E. coli*, *S.*

*aureus*, and *P. aeruginosa*) were cultured at different concentrated D<sub>2</sub>O containing LB medium, and their growth were monitored with optical density (OD) measurement at 600 nm wavelength. We found that D<sub>2</sub>O concentration up to 100% did not show significant toxicity to the growth of *E. coli* and *S. aureus*, as indicated by the growth curve in D<sub>2</sub>O media of various concentrations (Figure 1a and 1b). The growth of *P. aeruginosa* was initially slowed down in medium with D<sub>2</sub>O concentration of 70% and up, but eventually restored to normal growth after about 18 h for D<sub>2</sub>O concentration of 70% and 80%, and about 22 h for D<sub>2</sub>O concentration of 100% (Figure 1c). Therefore, D<sub>2</sub>O concentration of 70% or lower in the medium does not induce significant toxicity to the bacteria.

**Imaging metabolic incorporation of D<sub>2</sub>O in a single bacterium.** We chose 70% D<sub>2</sub>O containing LB medium to cultivate bacteria, and used *P. aeruginosa* to test whether the D<sub>2</sub>O metabolic incorporation in a single bacterium can be monitored by our SRS microscope. Spontaneous Raman spectra of bacteria showed a broad peak (2070–2250 cm<sup>-1</sup>) at C-D vibrational region for bacteria cultivated in the D<sub>2</sub>O containing medium for 2 h (Figure 2a), indicating D<sub>2</sub>O had been successfully utilized for biomolecule synthesis. For control, bacteria cultivated in normal medium did not have this peak at this region (Figure 2a). To image single bacterium, bacteria were further diluted and deposited on an agarose gel pad. By tuning the Raman shift to C-D region (~2162 cm<sup>-1</sup>), a strong signal was observed for individual bacterium cultivated in D<sub>2</sub>O containing medium (Figure 2b, right). As a control, no C-D signal was observed for bacteria cultured in normal medium (Figure 2b, left). The results were confirmed by SRS spectra (Figure 2c) obtained through temporal tuning of chirped pump and Stokes femtosecond pulses. Similar results were obtained on *E. coli* (Supporting Figure 1) and *S. aureus* (Supporting Figure 2).

In order to shorten the D<sub>2</sub>O culture time, we tested whether non-chirped femtosecond pulses can enhance the signal over the chirped picosecond pulses. Because the C-D vibration band is relatively broad with a width of 180 cm<sup>-1</sup> (Figure 2c), we hypothesized that femtosecond SRS without chirping could significantly increase the signal to noise ratio (SNR). To test this, we cultivated *P. aeruginosa* in 70% D<sub>2</sub>O containing LB medium for 30 minutes, and imaged them at ~2162 cm<sup>-1</sup> by chirped picosecond pulses and non-chirped femtosecond pulses, respectively (Figure 3a and 3c). The pump and Stokes powers were adjusted to make sure the same average pump and Stokes powers were used. The SNR of individual bacterium with picosecond and femtosecond SRS was 1.43 and 7.81, respectively, indicating ~5.5 times SNR improvement with femtosecond SRS over picosecond SRS (Figure 3b and 3d). This improvement is attributed to two factors. First, the C-D vibrational band is broad, and the femtosecond SRS can detect broader band signal than the chirped picosecond SRS. Second, the pulse chirping reduced the peak power of the pulses. Although the same average power was used at the sample, the reduced peak power decreased the signal level due to the nonlinear effect of SRS.

**Time lapse measurement of D<sub>2</sub>O metabolic incorporation in a single bacterium.** Next, we studied the time lapse of D<sub>2</sub>O metabolic activity in single *P. aeruginosa* with femtosecond SRS. The *P. aeruginosa* was cultivated in 70% D<sub>2</sub>O containing LB medium for up to 3 h. Figure 4a shows the SRS images of

single *P. aeruginosa* at  $\sim 2162\text{ cm}^{-1}$ , C-D signal in individual *P. aeruginosa* can be observed after culture as short as 10 minutes. Statistical analysis showed that the average C-D signal intensity in individual bacterium increases with time, and saturates at  $\sim 1.5\text{ h}$  (Figure 4c), which is about three generations since the generation time of *P. aeruginosa* cultivated in LB medium is 24–27 minutes<sup>28</sup>. To view individual bacterium more clearly, the images in Figure 4a were further zoomed in (Figure 4b). Interestingly, in the 10 minutes result, a stronger signal was observed in the cell periphery of bacterium (Figure 4b), as indicated by the intensity plot over the bacteria (Figure 4d). In contrast, in and after 30 minutes, the signal intensity is stronger in the intracellular area (Figure 4b), as indicated by the intensity plot over bacteria in the 30 minutes result (Figure 4e). Collectively, these results suggest that D<sub>2</sub>O is initially used to synthesize cell membrane and/or cell wall in *P. aeruginosa*.

**Rapid AST.** To examine how antibiotics affect the metabolic incorporation of D<sub>2</sub>O in bacteria, and whether it can be used for rapid AST through SRS imaging, *P. aeruginosa* were cultivated in 70 % D<sub>2</sub>O containing LB medium, with the addition of 20  $\mu\text{g/ml}$  gentamicin or cefotaxime. The susceptibility of *P. aeruginosa* were pre-determined to be susceptible to gentamicin and resistant to cefotaxime at this concentration by the conventional culture-based microdilution method. SRS imaging at  $\sim 2162\text{ cm}^{-1}$  showed that the C-D signal was significantly reduced after cultivation in 20  $\mu\text{g/ml}$  gentamicin (Figure 5a), indicating that the metabolic activity of D<sub>2</sub>O in *P. aeruginosa* was inhibited by gentamicin. On contrary, *P. aeruginosa* cultivated in cefotaxime can be observed at  $\sim 2162\text{ cm}^{-1}$  SRS imaging at all time points, indicating active metabolic incorporation of D<sub>2</sub>O in *P. aeruginosa* when cultivated in cefotaxime. We observed that *P. aeruginosa* tends to form long rods when cultivated in cefotaxime (Figure 5b). This filamentary formation, which happens when Gram-negative bacteria are treated with  $\beta$ -lactam antibiotics, was also observed for *P. aeruginosa* treated with ceftazidime<sup>10</sup>.

To examine whether the D<sub>2</sub>O metabolic activity of bacteria can be used to rapidly differentiate the antibiotic susceptibility of bacteria, the average C-D signal intensity of bacteria was compared between three groups (Figure 5c - 5h), the control without antibiotics treatment (Figure 4a), treated with gentamicin (Figure 5a), and treated with cefotaxime (Figure

5b). To separate the susceptible and resistant group, we determined a 65% line threshold, which is 65% the average C-D intensity of bacteria in control, in all plots from 10 minutes to 3 h results (Figure 5c - 5h). This threshold can clearly divide the susceptible and resistant groups, the group treated with gentamicin was always below the threshold, and the group treated with cefotaxime was always above the threshold. Therefore, the susceptibility of *P. aeruginosa* to gentamicin and cefotaxime can be determined in as short as 10 minutes.

**Metabolic activity based MIC determination.** To test whether SRS metabolic imaging can quantitate the minimal inhibitory concentration (MIC) of antibiotics to bacteria, we cultivated *P. aeruginosa* in 70% D<sub>2</sub>O containing LB medium for 1 hour with the addition of gentamicin with serial diluted concentration. SRS imaging at  $\sim 2162\text{ cm}^{-1}$  showed that the D<sub>2</sub>O metabolic activity of *P. aeruginosa* was inhibited at 8  $\mu\text{g/ml}$  or higher concentrated gentamicin cultivation (Figure 6a). For control, no C-D signal was observed for *P. aeruginosa* cultivated in normal LB medium. The average intensity of *P. aeruginosa* C-D signal was plotted and compared. With the 65% intensity threshold, the metabolic activity based MIC was determined to be 8  $\mu\text{g/ml}$  by the SRS-based D<sub>2</sub>O metabolic imaging method (Figure 6b). This value is consistent with the MIC determined by the broth dilution method.

## Conclusion

We demonstrated rapid determination of the susceptibility of bacteria in 10 minutes by SRS imaging of the D<sub>2</sub>O metabolic incorporation in bacteria. Femtosecond SRS imaging can monitor D<sub>2</sub>O metabolism in bacteria at the single cell level with high signal to noise ratio. Antibiotics can inhibit the metabolic activity of D<sub>2</sub>O when the bacteria are susceptible to this antibiotic, and this inhibition can be observed after culture in D<sub>2</sub>O containing medium for 10 minutes. The metabolic activity based MIC can be quantitated by our method. Because water is an essential molecule for biosynthesis in bacteria, the SRS-based D<sub>2</sub>O metabolic imaging method has the potential to be generalized for rapid AST in various species including clinical samples.

- (1) O'Neill, J. *Tackling drug-resistant infections globally: final report and recommendations*; The review on antimicrobial resistance, **2016**.
- (2) Sugden, R.; Kelly, R.; Davies, S. *Nature microbiology* **2016**, *1*, 16187.
- (3) Kumar, A.; Roberts, D.; Wood, K. E.; Light, B.; Parrillo, J. E.; Sharma, S.; Suppes, R.; Feinstein, D.; Zanotti, S.; Taiberg, L. *Critical care medicine* **2006**, *34*, 1589-1596.
- (4) Schoepp, N. G.; Schlappi, T. S.; Curtis, M. S.; Butkovich, S. S.; Miller, S.; Humphries, R. M.; Ismagilov, R. F. *Science Translational Medicine* **2017**, *9*, eaa13693.
- (5) Murray, C.; Adeyiga, O.; Owsley, K.; Di Carlo, D. *Lab on A Chip* **2015**, *15*, 1226-1229.
- (6) Hou, Z.; An, Y.; Hjort, K.; Sandegren, L.; Wu, Z. *Lab on A Chip* **2014**, *14*, 3409-3418.
- (7) Choi, J.; Jung, Y.-G.; Kim, J.; Kim, S.; Jung, Y.; Na, H.; Kwon, S. *Lab on a Chip* **2013**, *13*, 280-287.

## AUTHOR INFORMATION

### Corresponding Authors

\*E-mail: [jxcheng@bu.edu](mailto:jxcheng@bu.edu)

### Author Contributions

J.X.C. and W.H. conceived the idea. W.H. designed the experiment. W.H. and L.L. conducted the experiment. W.H. analyzed the data. W.H., and J.X.C. co-wrote the manuscript. All authors have given approval to the final version of the manuscript.

### Notes

The authors declare no competing financial interests.

## ACKNOWLEDGMENT

This work was supported by Keck Foundation Science & Engineering Grant and R01GM118471 to JXC.

## REFERENCES

- (8) Lu, Y.; Gao, J.; Zhang, D. D.; Gau, V.; Liao, J. C.; Wong, P. K. *Analytical Chemistry* **2013**, *85*, 3971-3976.
- (9) Kim, S. C.; Cestellosblanco, S.; Inoue, K.; Zare, R. N. *Antibiotics* **2015**, *4*, 455-466.
- (10) Choi, J.; Yoo, J.; Lee, M.; Kim, E.-G.; Lee, J. S.; Lee, S.; Joo, S.; Song, S. H.; Kim, E.-C.; Lee, J. C. *Science translational medicine* **2014**, *6*, 267ra174-267ra174.
- (11) Baltekin, Ö.; Boucharin, A.; Tano, E.; Andersson, D. I.; Elf, J. *Proceedings of the National Academy of Sciences* **2017**, *114*, 9170-9175.
- (12) Fredborg, M.; Andersen, K. R.; Jørgensen, E.; Droce, A.; Olesen, T.; Jensen, B. B.; Rosenvinge, F. S.; Sondergaard, T. E. *Journal of Clinical Microbiology* **2013**, *51*, 2047-2053.
- (13) Schoepp, N. G.; Khorosheva, E. M.; Schlappi, T. S.; Curtis, M. S.; Humphries, R. M.; Hindler, J. A.; Ismagilov, R. F. *Angewandte Chemie International Edition* **2016**, *55*, 9557-9561.
- (14) Barczak, A. K.; Hung, D. T. *Proceedings of the National Academy of Sciences* **2012**, *109*, 6217-6222.
- (15) Schröder, U.-C.; Beleites, C.; Assmann, C.; Glaser, U.; Hübner, U.; Pfister, W.; Fritzsche, W.; Popp, J.; Neugebauer, U. *Scientific reports* **2015**, *5*, 8217.
- (16) Tao, Y.; Wang, Y.; Huang, S.; Zhu, P.; Huang, W. E.; Ling, J.; Xu, J. *Analytical Chemistry* **2017**, *89*, 4108-4115.
- (17) Syal, K.; Mo, M.; Yu, H.; Iriya, R.; Jing, W.; Sui, G.; Wang, S.; Grys, T. E.; Haydel, S. E.; Tao, N. *Theranostics* **2017**, *7*, 1795-1805.
- (18) Hong, W.; Karanja, C. W.; Abutaleb, N. S.; Younis, W.; Zhang, X.; Seleem, M. N.; Cheng, J.-X. *Analytical Chemistry* **2018**, *90*, 3737-3743.
- (19) Berry, D.; Mader, E.; Lee, T. K.; Woebken, D.; Wang, Y.; Zhu, D.; Palatinszky, M.; Schintlmeister, A.; Schmid, M. C.; Hanson, B. T. *Proceedings of the National Academy of Sciences* **2015**, *112*, E194-E203.
- (20) Fu, D.; Yu, Y.; Follick, A.; Currie, E.; Farese Jr, R. V.; Tsai, T.-H.; Xie, X. S.; Wang, M. C. *Journal of the American Chemical Society* **2014**, *136*, 8820-8828.
- (21) Freudiger, C. W.; Min, W.; Saar, B. G.; Lu, S.; Holtom, G. R.; He, C.; Tsai, J. C.; Kang, J. X.; Xie, X. S. *Science* **2008**, *322*, 1857-1861.
- (22) Cheng, J.-X.; Xie, X. S. *Science* **2015**, *350*, aaa8870.
- (23) Zhang, C.; Zhang, D.; Cheng, J.-X. *Annual review of biomedical engineering* **2015**, *17*, 415-445.
- (24) Nanakumar, P.; Kovalev, A.; Volkmer, A. *New Journal of Physics* **2009**, *11*, 033026.
- (25) Cheng, Q.; Wei, L.; Liu, Z.; Ni, N.; Sang, Z.; Zhu, B.; Xu, W.; Chen, M.; Miao, Y.; Chen, L.-Q. *Nature Communications* **2018**, *9*, 2942.
- (26) He, R.; Xu, Y.; Zhang, L.; Ma, S.; Wang, X.; Ye, D.; Ji, M. *Optica* **2017**, *4*, 44-47.
- (27) Shi, L.; Zheng, C.; Shen, Y.; Chen, Z.; Silveira, E. S.; Zhang, L.; Wei, M.; Liu, C.; de Sena-Tomas, C.; Targoff, K.; Min, W. *Nature Communications* **2018**, *9*, 2995.
- (28) Yang, L.; Haagenen, J. A.; Jelsbak, L.; Johansen, H. K.; Sternberg, C.; Høiby, N.; Molin, S. *Journal of Bacteriology* **2008**, *190*, 2767-2776.

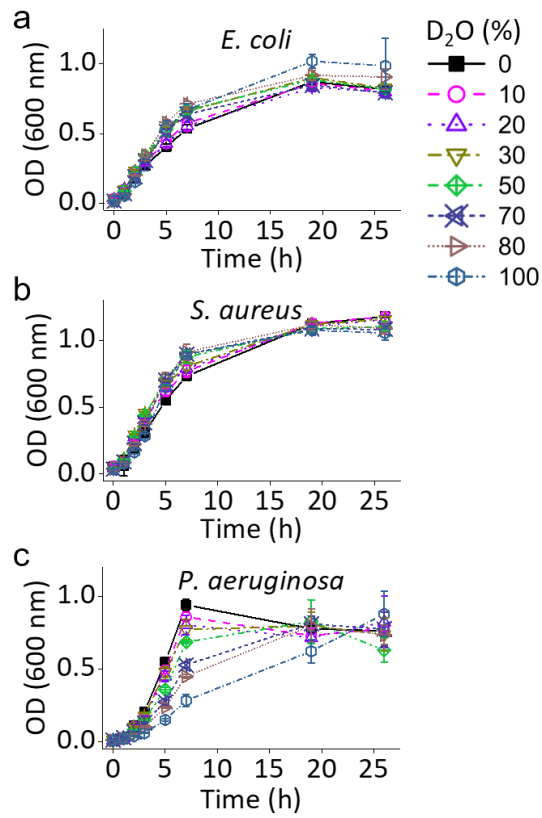

**Figure 1.** Testing of D<sub>2</sub>O toxicity to bacteria growth. Growth curve of *E. coli* (a), *S. aureus* (b) and *P. aeruginosa* (c) cultivated in LB medium with different D<sub>2</sub>O concentrations.

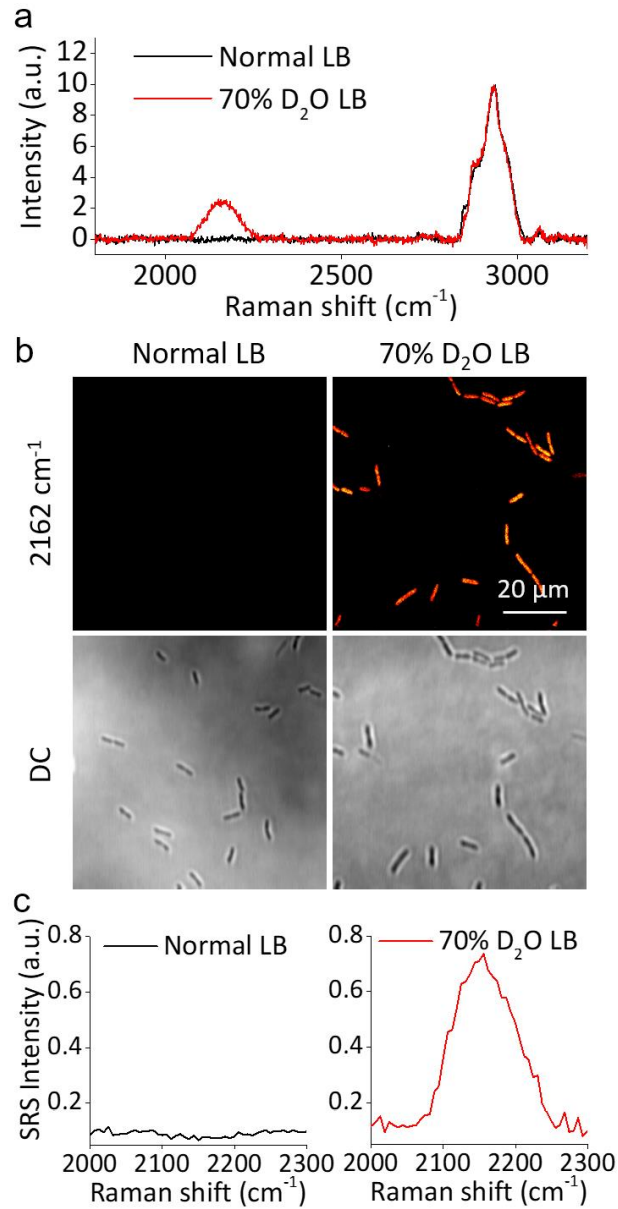

**Figure 2.** Biosynthesis in *P. aeruginosa* in  $D_2O$  containing LB medium. a) Spontaneous Raman spectra of high-density *P. aeruginosa* cultivated in normal LB and 70%  $D_2O$  containing LB medium for 2 h. b) SRS imaging at  $\sim 2162\text{ cm}^{-1}$  and the corresponding transmission images of *P. aeruginosa* cultivated in normal and 70%  $D_2O$  containing LB medium for 2 h. c) Corresponding SRS spectra of a single bacterium in (b).

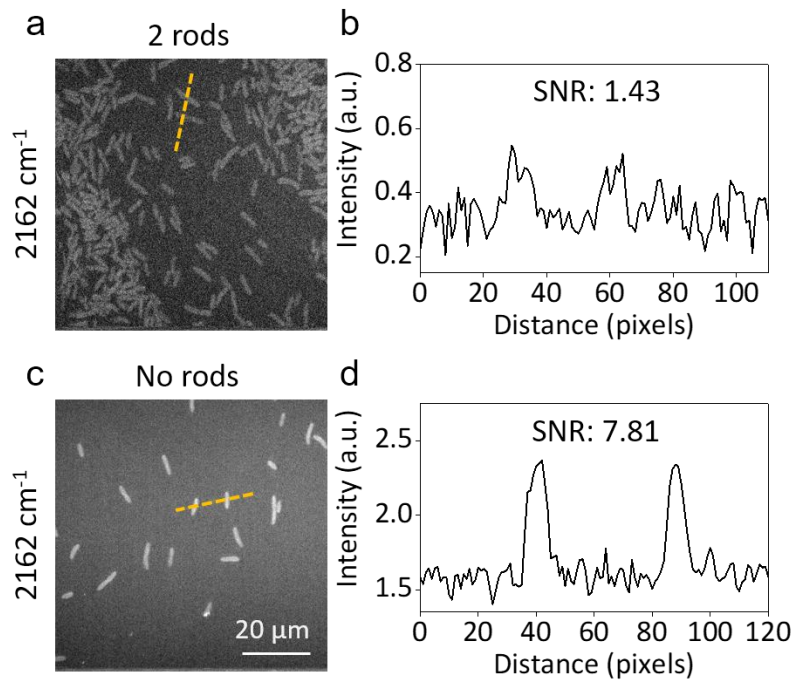

**Figure 3.** Femtosecond SRS improves SNR at C-D vibrational region over the chirped SRS. a) SRS imaging at  $\sim 2162 \text{ cm}^{-1}$  of *P. aeruginosa* cultivated in 70%  $\text{D}_2\text{O}$  containing LB medium for 30 minutes with picosecond pulses generated by chirping with two SF57 glass rods. b) Intensity plot of the orange line over bacteria in (a). c) SRS imaging at  $\sim 2162 \text{ cm}^{-1}$  of *P. aeruginosa* cultivated in 70%  $\text{D}_2\text{O}$  containing LB medium for 30 minutes with non-chirped femtosecond pulses. d) Intensity plot of the orange line over bacteria in (c).

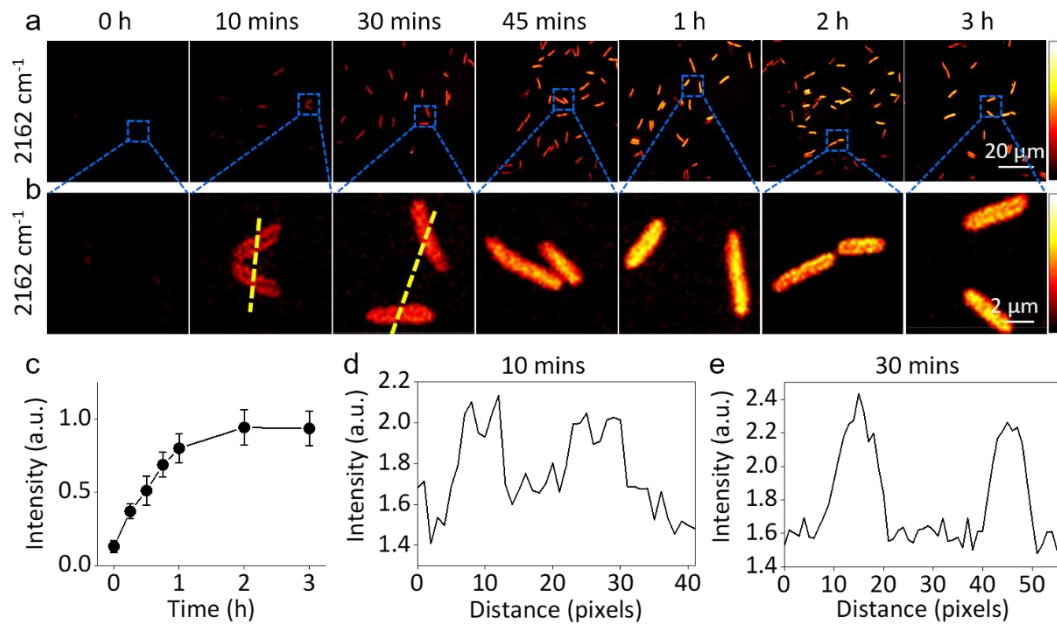

**Figure 4.** Time lapse SRS imaging of D<sub>2</sub>O-based biosynthesis in *P. aeruginosa*. a) SRS imaging of *P. aeruginosa* cultivated in 70% D<sub>2</sub>O containing LB medium from time 0 to 3 h. b) Zoom in SRS imaging of individual *P. aeruginosa* in the rectangular square in (a). c) Growth of average SRS intensity of individual *P. aeruginosa* shown in panel a. Error bars indicate standard deviation (N > 10). d) Intensity plot of the yellow line over bacteria from the 10 minutes result in (b). e) Intensity plot of the yellow line over bacteria from the 30 minutes result in (b).



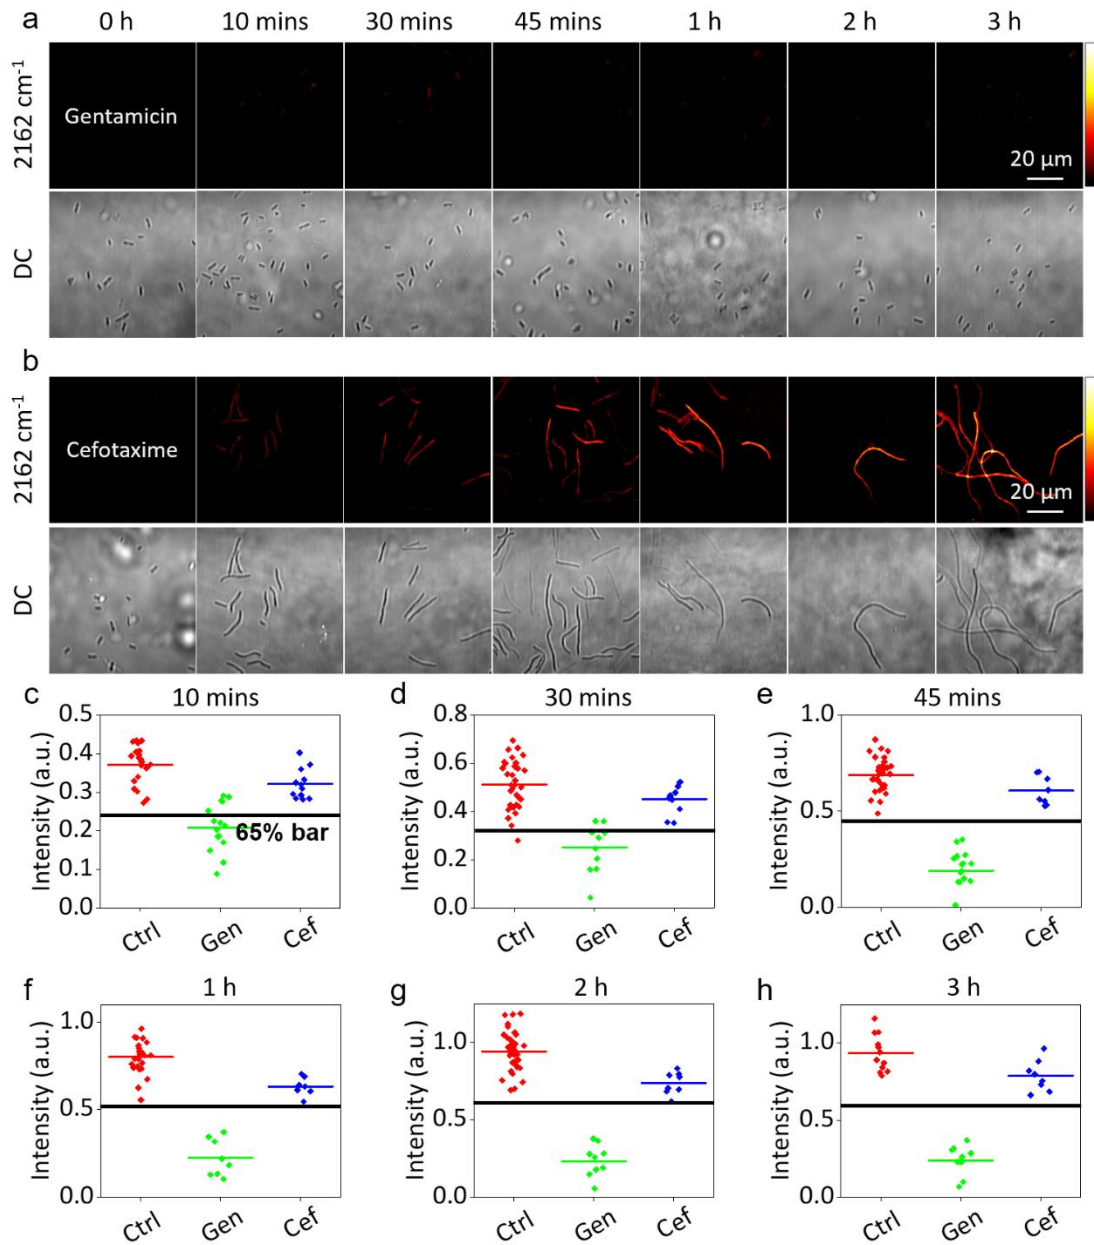

**Figure 5.** SRS-based antibiotic susceptibility testing of *P. aeruginosa*. a, b) C-D SRS imaging at  $\sim 2162 \text{ cm}^{-1}$  and transmission images of *P. aeruginosa* cultivated in 70%  $\text{D}_2\text{O}$  containing LB medium with the addition of 20  $\mu\text{g/ml}$  gentamicin (a) or cefotaxime (b). c - f) Average C-D signal intensity of *P. aeruginosa* cultivated in 70%  $\text{D}_2\text{O}$  containing LB medium without antibiotic treatment (control), and with gentamicin or cefotaxime treatment for 10 minutes (c), 30 minutes (d), 45 minutes (e), 1 h (f), 2 h (g) or 3 h (h). The colour bar indicates average C-D signal intensity of individual *P. aeruginosa* in each group. Black bar indicates the 65% intensity value of the average *P. aeruginosa* C-D signal intensity in control.

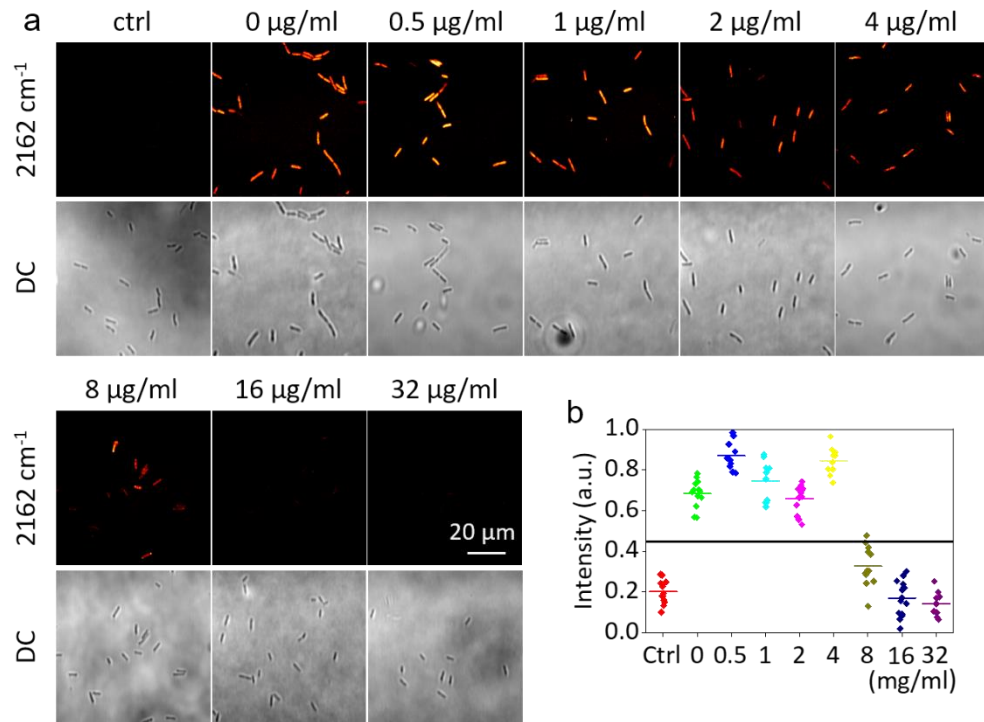

**Figure 6.** MIC determination of *P. aeruginosa* against gentamicin. a) C-D SRS imaging at  $\sim 2162 \text{ cm}^{-1}$  and transmission images of *P. aeruginosa* cultivated in normal LB (control) or 70%  $\text{D}_2\text{O}$  containing LB medium with the addition of different concentrated gentamicin. b) Average C-D signal intensity of individual *P. aeruginosa* in (a). Black bar indicates 65% intensity bar of the average SRS intensity of individual *P. aeruginosa* in  $\text{D}_2\text{O}$  containing LB medium without treatment (0  $\mu\text{g/ml}$ ).
